# Supplementary material for: Association between co-residence with parents and General Anxiety Disorder in Korean adolescents
Source: Research Square preprint supplement (doi:10.21203/rs.3.rs-5767906/v1), 2025-01-13
Supplement: Supplementary file 1 [file 42bbe4d8b339e4ad5452831c.docx]

| **Table 1. General characteristics of the study population** | | | | | |  | |  | |  | | |  |  | |  | |  | |  |  |  | |  |  |
| --- | --- | --- | --- | --- | --- | --- | --- | --- | --- | --- | --- | --- | --- | --- | --- | --- | --- | --- | --- | --- | --- | --- | --- | --- | --- |
| **Variables** | | | | **Generalized Anxiety Disorder (GAD)** | | | | | | | | | | | | | | | | | | | | | |
| **Boy** | | | | | | | | | | | | **Girl** | | | | | | | | | |
| **Total** | | **Yes** | | | | **No** | | | | ***P-value*** | | **Total** | | | | **Yes** | | **No** | | | ***P-value*** |
| **N** | **%** | **N** | | **%** | | **N** | | | **%** | **N** | | **%** | | **N** | **%** | **N** | | **%** |
| **Total (*N*=208,891)** | | | | 107,326 | 100.0 | 30,353 | | 28.3 | | 76,973 | | | 71.7 |  | | 101,565 | | 100.0 | | 42,288 | 41.6 | 59,277 | | 58.4 |  |
| **Co-residence with parents** | | | |  |  |  | |  | |  | | |  | <.0001 | |  | |  | |  |  |  | |  | <.0001 |
|  | | Yes | | 101,942 | 95.0 | 28549 | | 28.0 | | 73393 | | | 72.0 |  | | 97,397 | | 95.9 | | 40329 | 41.4 | 57068 | | 58.6 |  |
|  | | No | | 5,384 | 5.0 | 1804 | | 33.5 | | 3580 | | | 66.5 |  | | 4,168 | | 4.1 | | 1959 | 47.0 | 2209 | | 53.0 |  |
| **Age (year)** | |  | |  |  |  | |  | |  | | |  | <.0001 | |  | |  | |  |  |  | |  | <.0001 |
|  | | 13 | | 19,562 | 18.2 | 4790 | | 24.5 | | 14772 | | | 75.5 |  | | 18,502 | | 18.2 | | 7069 | 38.2 | 11433 | | 61.8 |  |
|  | | 14 | | 19,176 | 17.9 | 5152 | | 26.9 | | 14024 | | | 73.1 |  | | 18,371 | | 18.1 | | 7665 | 41.7 | 10706 | | 58.3 |  |
|  | | 15 | | 18,991 | 17.7 | 5498 | | 29.0 | | 13493 | | | 71.0 |  | | 18,021 | | 17.7 | | 7685 | 42.6 | 10336 | | 57.4 |  |
|  | | 16 | | 17,427 | 16.2 | 5024 | | 28.8 | | 12403 | | | 71.2 |  | | 16,589 | | 16.3 | | 6835 | 41.2 | 9754 | | 58.8 |  |
|  | | 17 | | 16,955 | 15.8 | 5001 | | 29.5 | | 11954 | | | 70.5 |  | | 15,778 | | 15.5 | | 6603 | 41.8 | 9175 | | 58.2 |  |
|  | | 18 | | 15,215 | 14.2 | 4888 | | 32.1 | | 10327 | | | 67.9 |  | | 14,304 | | 14.1 | | 6431 | 45.0 | 7873 | | 55.0 |  |
| **Household income level** | | | |  |  |  | |  | |  | | |  | <.0001 | |  | |  | |  |  |  | |  | <.0001 |
|  | | High | | 46,058 | 42.9 | 12078 | | 26.2 | | 33980 | | | 73.8 |  | | 39,173 | | 38.6 | | 14982 | 38.2 | 24191 | | 61.8 |  |
|  | | Middle | | 48,810 | 45.5 | 13460 | | 27.6 | | 35350 | | | 72.4 |  | | 50,340 | | 49.6 | | 20633 | 41.0 | 29707 | | 59.0 |  |
|  | | Low | | 12,458 | 11.6 | 4815 | | 38.6 | | 7643 | | | 61.4 |  | | 12,052 | | 11.9 | | 6673 | 55.4 | 5379 | | 44.6 |  |
| **Region** | |  | |  |  |  | |  | |  | | |  | <.0001 | |  | |  | |  |  |  | |  | <.0001 |
|  | | Metropolitan | | 46,446 | 43.3 | 12874 | | 27.7 | | 33572 | | | 72.3 |  | | 43,857 | | 43.2 | | 17844 | 40.7 | 26013 | | 59.3 |  |
|  | | Medium-sized city | | 52,516 | 48.9 | 15186 | | 28.9 | | 37330 | | | 71.1 |  | | 50,155 | | 49.4 | | 21270 | 42.4 | 28885 | | 57.6 |  |
|  | | Rural | | 8,364 | 7.8 | 2293 | | 27.4 | | 6071 | | | 72.6 |  | | 7,553 | | 7.4 | | 3174 | 42.0 | 4379 | | 58.0 |  |
| **Body mass index (BMI)** | | | |  |  |  | |  | |  | | |  | <.0001 | |  | |  | |  |  |  | |  | <.0001 |
|  | | Underweight | | 7,678 | 7.2 | 2320 | | 30.2 | | 5358 | | | 69.8 |  | | 9,322 | | 9.2 | | 3916 | 42.0 | 5406 | | 58.0 |  |
|  | | Normal | | 70,292 | 65.5 | 19459 | | 27.7 | | 50833 | | | 72.3 |  | | 74,542 | | 73.4 | | 30559 | 41.0 | 43983 | | 59.0 |  |
|  | | Overweight | | 11,861 | 11.1 | 3346 | | 28.2 | | 8515 | | | 71.8 |  | | 8,475 | | 8.3 | | 3660 | 43.2 | 4815 | | 56.8 |  |
|  | | Obese | | 17,495 | 16.3 | 5228 | | 29.9 | | 12267 | | | 70.1 |  | | 9,226 | | 9.1 | | 4153 | 45.0 | 5073 | | 55.0 |  |
| **Physical activity (60 minutes per day)** | | | |  |  |  | |  | |  | | |  | <.0001 | |  | |  | |  |  |  | |  | 0.002 |
|  | | No | | 82,640 | 77.0 | 23829 | | 28.8 | | 58811 | | | 71.2 |  | | 92,571 | | 91.1 | | 38405 | 41.5 | 54166 | | 58.5 |  |
|  | | Yes | | 24,686 | 23.0 | 6524 | | 26.4 | | 18162 | | | 73.6 |  | | 8,994 | | 8.9 | | 3883 | 43.2 | 5111 | | 56.8 |  |
| **Smoking experience** | | | |  |  |  | |  | |  | | |  | <.0001 | |  | |  | |  |  |  | |  | <.0001 |
|  | | No | | 94,216 | 87.8 | 25733 | | 27.3 | | 68483 | | | 72.7 |  | | 95,429 | | 94.0 | | 38698 | 40.6 | 56731 | | 59.4 |  |
|  | | Yes | | 13,110 | 12.2 | 4620 | | 35.2 | | 8490 | | | 64.8 |  | | 6,136 | | 6.0 | | 3590 | 58.5 | 2546 | | 41.5 |  |
| **Alcohol consumption experience** | | | |  |  |  | |  | |  | | |  | <.0001 | |  | |  | |  |  |  | |  | <.0001 |
|  | | No | | 67,036 | 62.5 | 17356 | | 25.9 | | 49680 | | | 74.1 |  | | 72,907 | | 71.8 | | 27901 | 38.3 | 45006 | | 61.7 |  |
|  | | Yes | | 40,290 | 37.5 | 12997 | | 32.3 | | 27293 | | | 67.7 |  | | 28,658 | | 28.2 | | 14387 | 50.2 | 14271 | | 49.8 |  |
| **Self-rated health status** | | | |  |  |  | |  | |  | | |  | <.0001 | |  | |  | |  |  |  | |  | <.0001 |
|  | | Healthy | | 76,341 | 71.1 | 17122 | | 22.4 | | 59219 | | | 77.6 |  | | 61,863 | | 60.9 | | 20192 | 32.6 | 41671 | | 67.4 |  |
|  | | Normal | | 22,756 | 21.2 | 8696 | | 38.2 | | 14060 | | | 61.8 |  | | 29,255 | | 28.8 | | 14794 | 50.6 | 14461 | | 49.4 |  |
|  | | Unhealthy | | 8,227 | 7.7 | 4533 | | 55.1 | | 3694 | | | 44.9 |  | | 10,447 | | 10.3 | | 7302 | 69.9 | 3145 | | 30.1 |  |
| **Stress perception** | |  | |  |  |  | |  | |  | | |  | <.0001 | |  | |  | |  |  |  | |  | <.0001 |
|  | | Very | | 33,530 | 31.2 | 18561 | | 55.4 | | 14969 | | | 44.6 |  | | 44,780 | | 44.1 | | 29941 | 66.9 | 14839 | | 33.1 |  |
|  | | A little | | 48,261 | 45.0 | 10268 | | 21.3 | | 37993 | | | 78.7 |  | | 42,860 | | 42.2 | | 11334 | 26.4 | 31526 | | 73.6 |  |
|  | | None | | 25,535 | 23.8 | 1524 | | 6.0 | | 24011 | | | 94.0 |  | | 13,925 | | 13.7 | | 1013 | 7.3 | 12912 | | 92.7 |  |
| **Sleep** | |  | |  |  |  | |  | |  | | |  | <.0001 | |  | |  | |  |  |  | |  | <.0001 |
|  | | Enough | | 32,794 | 30.6 | 5563 | | 17.0 | | 27231 | | | 83.0 |  | | 21,029 | | 20.7 | | 5527 | 26.3 | 15502 | | 73.7 |  |
|  | | Normal | | 36,851 | 34.3 | 9485 | | 25.7 | | 27366.0 | | | 74.3 |  | | 32,399 | | 31.9 | | 11696 | 36.1 | 20703 | | 63.9 |  |
|  | | Not enough | | 37,681 | 35.1 | 15305 | | 40.6 | | 22376 | | | 59.4 |  | | 48,137 | | 47.4 | | 25065 | 52.1 | 23072 | | 47.9 |  |
| **Academic performance** | | | |  |  |  | |  | |  | | |  | <.0001 | |  | |  | |  |  |  | |  | <.0001 |
|  | | High | | 41,222 | 38.4 | 11319 | | 27.5 | | 29903 | | | 72.5 |  | | 37,930 | | 37.3 | | 14803 | 39.0 | 23127 | | 61.0 |  |
|  | | Middle | | 31,576 | 29.4 | 8300 | | 26.3 | | 23276 | | | 73.7 |  | | 31,544 | | 31.1 | | 12402 | 39.3 | 19142 | | 60.7 |  |
|  | | Low | | 34,528 | 32.2 | 10734 | | 31.1 | | 23794 | | | 68.9 |  | | 32,091 | | 31.6 | | 15083 | 47.0 | 17008 | | 53.0 |  |
|  | |  | |  |  |  | |  | |  | | |  |  | |  | |  | |  |  |  | |  |  |
| * Adjusted for all covariates | | | | | | | | | | | | | | | | | | | | | | | | | |
| **Table 2. Results of factors associated between co-residence with parents and Generalized Anxiety Disorder (GAD)** | | | | | | | | | | | | | | | | | | | | | | |
| **Variables*** | | | **GAD** | | | | | | | | | | | | | | | | | | | |
| **Boy** | | | | | | | |  | **Girl** | | | | | | | | | | |
| **OR** | | **95% CI** | | | | | |  | **OR** | | | **95% CI** | | | | | | | |
| **Co-residence with parents** | | |  | |  | |  | |  | |  |  | | |  | |  | |  | | | |
|  | Yes | | 1.00 | |  | |  | |  | |  | 1.00 | | |  | |  | |  | | | |
|  | No | | 1.19 | | (1.10 | | - | | 1.28) | |  | 1.08 | | | (1.01 | | - | | 1.17) | | | |
| **Age (year)** |  | |  | |  | |  | |  | |  |  | | |  | |  | |  | | | |
|  | 13 | | 1.00 | |  | |  | |  | |  | 1.00 | | |  | |  | |  | | | |
|  | 14 | | 1.07 | | (1.01 | | - | | 1.13) | |  | 1.03 | | | (0.98 | | - | | 1.08) | | | |
|  | 15 | | 1.12 | | (1.07 | | - | | 1.18) | |  | 0.98 | | | (0.93 | | - | | 1.03) | | | |
|  | 16 | | 1.01 | | (0.96 | | - | | 1.07) | |  | 0.80 | | | (0.76 | | - | | 0.84) | | | |
|  | 17 | | 1.01 | | (0.96 | | - | | 1.07) | |  | 0.76 | | | (0.72 | | - | | 0.80) | | | |
|  | 18 | | 1.10 | | (1.04 | | - | | 1.17) | |  | 0.85 | | | (0.80 | | - | | 0.90) | | | |
| **Household income level** | | |  | |  | |  | |  | |  |  | | |  | |  | |  | | | |
|  | High | | 1.00 | |  | |  | |  | |  | 1.00 | | |  | |  | |  | | | |
|  | Middle | | 0.98 | | (0.94 | | - | | 1.01) | |  | 1.01 | | | (0.98 | | - | | 1.04) | | | |
|  | Low | | 1.23 | | (1.17 | | - | | 1.29) | |  | 1.37 | | | (1.30 | | - | | 1.44) | | | |
| **Region** |  | |  | |  | |  | |  | |  |  | | |  | |  | |  | | | |
|  | Metropolitan | | 1.00 | |  | |  | |  | |  | 1.00 | | |  | |  | |  | | | |
|  | Medium-sized city | | 1.05 | | (1.01 | | - | | 1.08) | |  | 1.06 | | | (1.02 | | - | | 1.09) | | | |
|  | Rural | | 0.96 | | (0.90 | |  | | 1.03) | |  | 1.02 | | | (0.96 | | - | | 1.09) | | | |
| **Body mass index (BMI)** | | |  | |  | |  | |  | |  |  | | |  | |  | |  | | | |
|  | Underweight | | 0.99 | | (0.94 | |  | | 1.05) | |  | 1.01 | | | (0.96 | | - | | 1.06) | | | |
|  | Normal | | 1.00 | |  | |  | |  | |  | 1.00 | | |  | |  | |  | | | |
|  | Overweight | | 0.97 | | (0.92 | | - | | 1.01) | |  | 0.99 | | | (0.94 | | - | | 1.04) | | | |
|  | Obese | | 0.90 | | (0.87 | | - | | 0.94) | |  | 0.94 | | | (0.90 | | - | | 0.99) | | | |
| **Physical activity (60 minutes per day)** | | | | |  | |  | |  | |  |  | | |  | |  | | 1.18) | | | |
|  | No | | 1.00 | |  | |  | |  | |  | 1.00 | | |  | |  | |  | | | |
|  | Yes | | 1.01 | | (0.97 | | - | | 1.05) | |  | 0.92 | | | (0.87 | | - | | 0.97) | | | |
| **Smoking experience** | | |  | |  | |  | |  | |  |  | | |  | |  | |  | | | |
|  | No | | 1.00 | |  | |  | |  | |  | 1.00 | | |  | |  | |  | | | |
|  | Yes | | 1.12 | | (1.07 | | - | | 1.17) | |  | 1.33 | | | (1.25 | | - | | 1.42) | | | |
| **Alcohol consumption experience** | | | | |  | |  | |  | |  |  | | |  | |  | |  | | | |
|  | No | | 1.00 | |  | |  | |  | |  | 1.00 | | |  | |  | |  | | | |
|  | Yes | | 1.11 | | (1.07 | | - | | 1.15) | |  | 1.26 | | | (1.22 | | - | | 1.31) | | | |
| **Self-rated health status** | | |  | |  | |  | |  | |  |  | | |  | |  | |  | | | |
|  | Healthy | | 1.00 | |  | |  | |  | |  | 1.00 | | |  | |  | |  | | | |
|  | Normal | | 1.60 | | (1.54 | | - | | 1.66) | |  | 1.51 | | | (1.46 | | - | | 1.56) | | | |
|  | Unhealthy | | 2.44 | | (2.31 | | - | | 2.57) | |  | 2.56 | | | (2.43 | | - | | 2.70) | | | |
| **Stress perception** | | |  | |  | |  | |  | |  |  | | |  | |  | |  | | | |
|  | Very | | 1.00 | |  | |  | |  | |  | 1.00 | | |  | |  | |  | | | |
|  | A little | | 0.25 | | (0.25 | | - | | 0.26) | |  | 0.21 | | | (0.20 | | - | | 0.22) | | | |
|  | None | | 0.07 | | (0.06 | | - | | 0.07) | |  | 0.05 | | | (0.05 | | - | | 0.05) | | | |
| **Sleep** |  | |  | |  | |  | |  | |  |  | | |  | |  | |  | | | |
|  | Enough | | 1.00 | |  | |  | |  | |  | 1.00 | | |  | |  | |  | | | |
|  | Normal | | 1.31 | | (1.26 | | - | | 1.37) | |  | 1.20 | | | (1.14 | | - | | 1.25) | | | |
|  | Not enough | | 1.83 | | (1.76 | | - | | 1.91) | |  | 1.61 | | | (1.54 | | - | | 1.68) | | | |
| **Academic performance** | | |  | |  | |  | |  | |  |  | | |  | |  | |  | | | |
|  | High | | 1.00 | |  | |  | |  | |  | 1.00 | | |  | |  | |  | | | |
|  | Middle | | 0.91 | | (0.88 | | - | | 0.95) | |  | 1.00 | | | (0.96 | | - | | 1.03) | | | |
|  | Low | | 0.94 | | (0.91 | | - | | 0.98) | |  | 1.12 | | | (1.08 | | - | | 1.17) | | | |
| * Adjusted for all covariates | | | | | | | | | | | | | | | | | | | | | | |

| **Table 3. Results of subgroup analysis stratified by independent variables** | | | | | |  | |  |  |  | |  | |  | |  | |  |  |  | |
| --- | --- | --- | --- | --- | --- | --- | --- | --- | --- | --- | --- | --- | --- | --- | --- | --- | --- | --- | --- | --- | --- |
| **Variables*** | | | | **Reside with parents vs. Do not reside with parents** | | | | | | | | | | | | | | | | | |
| **Generalized Anxiety Disorder (GAD)** | | | | | | | | | | | | | | | | | |
| **Boy** | | | | | | | |  | | **Girl** | | | | | | | |
| **Co-reside with parents** | **Do not co-reside with parents** | | | | | |  | | **Co-reside with parents** | | **Do not co-reside with parents** | | | | | |
| **OR** | **OR** | | **95% CI** | | | |  | | **OR** | | **OR** | | **95% CI** | | | |
| **Age (year)** | |  | |  | |  | |  |  |  | |  | |  | |  | |  |  |  | |
|  | 13 | | 1.00 | | | 0.94 | | (0.71 | - | 1.26) | |  | | 1.00 | | 1.32 | | (0.99 | - | 1.77) | |
|  | 14 | | 1.00 | | | 1.02 | | (0.78 | - | 1.33) | |  | | 1.00 | | 1.05 | | (0.77 | - | 1.42) | |
|  | 15 | | 1.00 | | | 1.37 | | (1.05 | - | 1.79) | |  | | 1.00 | | 0.94 | | (0.70 | - | 1.26) | |
|  | 16 | | 1.00 | | | 1.34 | | (1.18 | - | 1.52) | |  | | 1.00 | | 1.01 | | (0.88 | - | 1.16) | |
|  | 17 | | 1.00 | | | 1.22 | | (1.07 | - | 1.40) | |  | | 1.00 | | 1.12 | | (0.97 | - | 1.30) | |
|  | 18 | | 1.00 | | | 1.03 | | (0.88 | - | 1.19) | |  | | 1.00 | | 1.13 | | (0.97 | - | 1.32) | |
| **Household income level** | | |  | | |  | |  |  |  | |  | |  | |  | |  |  |  | |
|  | High | | 1.00 | | | 1.22 | | (1.08 | - | 1.38) | |  | | 1.00 | | 1.02 | | (0.88 | - | 1.17) | |
|  | Middle | | 1.00 | | | 1.17 | | (1.05 | - | 1.30) | |  | | 1.00 | | 1.08 | | (0.97 | - | 1.20) | |
|  | Low | | 1.00 | | | 1.17 | | (1.00 | - | 1.36) | |  | | 1.00 | | 1.19 | | (1.01 | - | 1.41) | |
| **Region** |  | |  | | |  | |  |  |  | |  | |  | |  | |  |  |  | |
|  | Metropolitan | | 1.00 | | | 1.20 | | (1.05 | - | 1.37) | |  | | 1.00 | | 1.04 | | (0.89 | - | 1.21) | |
|  | Medium-sized city | | 1.00 | | | 1.14 | | (1.03 | - | 1.26) | |  | | 1.00 | | 1.07 | | (0.95 | - | 1.19) | |
|  | Rural | | 1.00 | | | 1.26 | | (1.09 | - | 1.46) | |  | | 1.00 | | 1.16 | | (1.01 | - | 1.34) | |
| **Body mass index (BMI)** | | |  | | |  | |  |  |  | |  | |  | |  | |  |  |  | |
|  | Underweight | | 1.00 | | | 1.06 | | (0.80 | - | 1.40) | |  | | 1.00 | | 1.04 | | (0.81 | - | 1.35) | |
|  | Normal | | 1.00 | | | 1.16 | | (1.06 | - | 1.27) | |  | | 1.00 | | 1.06 | | (0.96 | - | 1.16) | |
|  | Overweight | | 1.00 | | | 1.15 | | (0.93 | - | 1.43) | |  | | 1.00 | | 1.18 | | (0.95 | - | 1.48) | |
|  | Obese | | 1.00 | | | 1.37 | | (1.16 | - | 1.61) | |  | | 1.00 | | 1.15 | | (0.92 | - | 1.43) | |
| **Physical activity (60 minutes per day)** | | |  | | |  | |  |  |  | |  | |  | |  | |  |  |  | |
|  | No | | 1.00 | | | 1.27 | | (1.17 | - | 1.38) | |  | | 1.00 | | 1.12 | | (1.03 | - | 1.21) | |
|  | Yes | | 1.00 | | | 0.97 | | (0.84 | - | 1.12) | |  | | 1.00 | | 0.84 | | (0.68 | - | 1.04) | |
| **Smoking experience** | | |  | | |  | |  |  |  | |  | |  | |  | |  |  |  | |
|  | No | | 1.00 | | | 1.16 | | (1.07 | - | 1.26) | |  | | 1.00 | | 1.07 | | (0.99 | - | 1.17) | |
|  | Yes | | 1.00 | | | 1.29 | | (1.10 | - | 1.51) | |  | | 1.00 | | 1.14 | | (0.90 | - | 1.45) | |
| **Alcohol consumption experience** | | |  | | |  | |  |  |  | |  | |  | |  | |  |  |  | |
|  | No | | 1.00 | | | 1.22 | | (1.11 | - | 1.34) | |  | | 1.00 | | 1.10 | | (0.99 | - | 1.23) | |
|  | Yes | | 1.00 | | | 1.16 | | (1.05 | - | 1.28) | |  | | 1.00 | | 1.05 | | (0.94 | - | 1.18) | |
| **Self-rated health status** | | |  | | |  | |  |  |  | |  | |  | |  | |  |  |  | |
|  | Healthy | | 1.00 | | | 1.19 | | (1.09 | - | 1.30) | |  | | 1.00 | | 1.10 | | (0.99 | - | 1.21) | |
|  | Normal | | 1.00 | | | 1.19 | | (1.03 | - | 1.38) | |  | | 1.00 | | 1.04 | | (0.92 | - | 1.18) | |
|  | Unhealthy | | 1.00 | | | 1.15 | | (0.91 | - | 1.44) | |  | | 1.00 | | 1.11 | | (0.89 | - | 1.39) | |
| **Stress perception** |  | |  | | |  | |  |  |  | |  | |  | |  | |  |  |  | |
|  | Very | | 1.00 | | | 1.10 | | (1.00 | - | 1.22) | |  | | 1.00 | | 1.02 | | (0.92 | - | 1.13) | |
|  | A little | | 1.00 | | | 1.19 | | (1.07 | - | 1.33) | |  | | 1.00 | | 1.11 | | (0.99 | - | 1.24) | |
|  | None | | 1.00 | | | 1.67 | | (1.35 | - | 2.07) | |  | | 1.00 | | 1.62 | | (1.19 | - | 2.21) | |
| **Sleep** |  | |  | | |  | |  |  |  | |  | |  | |  | |  |  |  | |
|  | Enough | | 1.00 | | | 1.11 | | (0.94 | - | 1.32) | |  | | 1.00 | | 1.04 | | (0.85 | - | 1.27) | |
|  | Normal | | 1.00 | | | 1.29 | | (1.14 | - | 1.46) | |  | | 1.00 | | 1.07 | | (0.93 | - | 1.23) | |
|  | Not enough | | 1.00 | | | 1.14 | | (1.04 | - | 1.26) | |  | | 1.00 | | 1.10 | | (1.00 | - | 1.22) | |
| **Academic performance** | | |  | | |  | |  |  |  | |  | |  | |  | |  |  |  | |
|  | High | | 1.00 | | | 1.18 | | (1.06 | - | 1.33) | |  | | 1.00 | | 0.98 | | (0.86 | - | 1.12) | |
|  | Middle | | 1.00 | | | 1.25 | | (1.09 | - | 1.43) | |  | | 1.00 | | 1.11 | | (0.96 | - | 1.28) | |
|  | Low | | 1.00 | | | 1.15 | | (1.02 | - | 1.29) | |  | | 1.00 | | 1.16 | | (1.02 | - | 1.31) | |
| * Adjusted for all covariates | |  | |  | |  | |  |  |  | |  | |  | |  | |  |  |  | |

| **Table 4. Results of subgroup analysis stratified by residence type** | | | | | | | | | |
| --- | --- | --- | --- | --- | --- | --- | --- | --- | --- |
| **Variables*** | **Generalized Anxiety Disorder (GAD)** | | | | | | | | |
| **Boy** | | | |  | **Girl** | | | |
| **OR** | **95% CI** | | |  | **OR** | **95% CI** | | |
| **Residence type** |  |  |  |  |  |  |  |  |  |
| Co-residence with parents | 1.00 |  |  |  |  | 1.00 |  |  |  |
| Co-residence with relatives | 1.67 | (1.35 | - | 2.08) |  | 1.31 | (1.05 | - | 1.64) |
| Living alone | 1.70 | (1.40 | - | 2.08) |  | 1.05 | (0.82 | - | 1.34) |
| Living in a dormitory | 1.07 | (0.98 | - | 1.16) |  | 1.06 | (0.97 | - | 1.16) |
| Living in an orphanage | 1.04 | (0.78 | - | 1.37) |  | 1.04 | (0.78 | - | 1.38) |
